# Supplementary material
Source: publisher figshare collection journal article supplement (https://gsajournals.figshare.com/ndownloader/files/14127263)
Supplement: Supplementary file 1 [file 14127263]

## Sheet: Sheet2
Name in F. assafoetida	KO	EC	Definition
oases3_CL17600Contig1_1	K15813	EC:5.4.99.39	β-Amyrin
oases3_k49_Locus_48413_Transcript_4_1	K15803	EC:4.2.3.75	(-)-germacrene D
oases6_k25_Locus_6897_Transcript_5_2	K15803	EC:4.2.3.75	(-)-germacrene D
oases6_k31_Locus_55853_Transcript_2_1	K00801	EC:2.5.1.21	farnesyl-diphosphate farnesyltransferase
oases6_k37_Locus_56543_Transcript_8_1	K00801	EC:2.5.1.21	farnesyl-diphosphate farnesyltransferase
oases6_k49_Locus_18297_Transcript_7_1	K00801	EC:2.5.1.21	farnesyl-diphosphate farnesyltransferase
